# Supplementary material for: Stat3 is a positive regulator of gap junctional intercellular communication in cultured, human lung carcinoma cells
Source: PubMed Central journal article supplement (PMC3575370; doi:10.1186/1471-2407-12-605), 2012-12-18
Supplement: 1471-2407-12-605-S1.pdf [file 1471-2407-12-605-S1.pdf]

Additional data

**Table Add-I**  
Effect of Src downregulation upon Stat3-tyr705

| Cell line                  | Treatment <sup>α</sup> | Src <sup>β</sup><br>(%) | Stat3 <sup>β</sup><br>(%) |
|----------------------------|------------------------|-------------------------|---------------------------|
| <b>A549</b>                | <b>DMSO</b>            | 95±11                   | 93±12                     |
| “                          | <b>Dasatinib</b>       | 10±2                    | 8±4                       |
| <b>E10-<i>Src</i></b>      | <b>DMSO</b>            | 98±12                   | 98±15                     |
| “                          | <b>Dasatinib</b>       | 8±1                     | 10±1                      |
| <b>SK-LuCi6-<i>Src</i></b> | <b>DMSO</b>            | 100±12                  | 100±12                    |
| “                          | <b>Dasatinib</b>       | 3±1                     | 5±3                       |
| <b>SK-Lu1</b>              | <b>DMSO</b>            | 85±5                    | 90±11                     |
| “                          | <b>Dasatinib</b>       | 15±4                    | 13±3                      |
| <b>CALU-1</b>              | <b>DMSO</b>            | 96±9                    | 100±10                    |
| “                          | <b>Dasatinib</b>       | 11±2                    | 13±3                      |
| <b>SW-900</b>              | <b>DMSO</b>            | 100±13                  | 100±12                    |
| “                          | <b>Dasatinib</b>       | 12±2                    | 14±3                      |
| <b>CALU-6</b>              | <b>DMSO</b>            | 95±11                   | 93±10                     |
| “                          | <b>Dasatinib</b>       | 8±2                     | 10±3                      |

<sup>α</sup>Cells were treated with 1μM Dasatinib, or the DMSO carrier when 50% confluent, for 24 hrs (see Methods).

<sup>β</sup>Stat3-tyr705 or Src-tyr418 levels were measured by Western blotting, as in Table I, legend.

## Stat3 immunostaining

SK-LuCi6

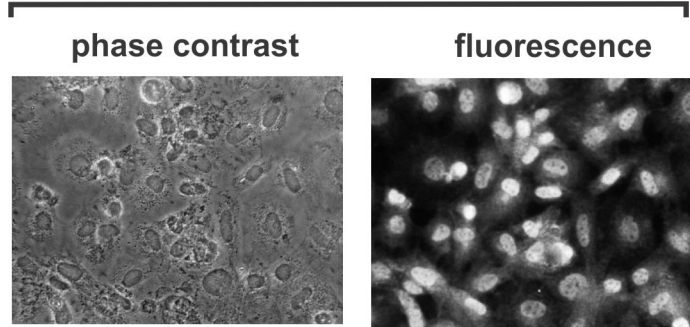

### Figure Add-1:

SK-LuCi6 cells were fixed 4% paraformaldehyde, permeabilized in 0.2% Triton-X100 and probed with a Stat3 antibody (Cell Signalling, #9132 diluted at 1:100) followed by AlexaFluor-coupled, goat anti-rabbit IgG. Note that most of the staining is nuclear.
